# Supplementary material
Source: MDPI journal article supplement (https://www.mdpi.com/1996-1073/15/22/8618)
Supplement: s1 [file s1]

**Table S1.** Source and level of each HM in various AD substrates.

| Substrate      | Source           | Heavy metals (mg/kg) |               |                |          |         |            | Reference |
|----------------|------------------|----------------------|---------------|----------------|----------|---------|------------|-----------|
|                |                  | Ni                   | Zn            | Cu             | Cd       | Cr      | As         |           |
| Food waste     | -                | -                    | 64            | 65             | 8        | -       | -          | [15]      |
| Poultry manure | Feed supplements | -                    | 203.37-394    | 19.78-94.73    | 0-0.60   | 0-65.10 | 0.75-4.59  | [16]      |
| Cattle manure  | Feed supplements | -                    | 33.82-224.12  | 14.08-58.78    | 0-3.60   | 0-3.60  | 0.73-4.65  |           |
| Swine manure   | Feed supplements | -                    | 332.47-901.82 | 266.83-1337.23 | 0-203.40 | 0-4.60  | 1.31-28.38 |           |

Note) All references in this table can be found in the main text.

**Table S2.** Presence and outcome of HM on AD reported in previous studies included in this manuscript.

| Heavy Metal         | Substrate                           | Concentration                                                          | Outcome                                                                                                                                                          | Reference |
|---------------------|-------------------------------------|------------------------------------------------------------------------|------------------------------------------------------------------------------------------------------------------------------------------------------------------|-----------|
| Fe, Ni, Co, and Mo  | Grass silage                        | 75, 1.7, 0.75, and 0.5 mg/L                                            | Advances COD, solubilization of SCFAs and higher methane turnout.                                                                                                | [22]      |
| Co and Ni           | Methanogenic biomass                | 0.05, 0.2 $\mu$ mol h <sup>-1</sup><br><br>2 $\mu$ mol h <sup>-1</sup> | Higher methane yields<br><br>Inhibitory                                                                                                                          | [23]      |
| Ni and Co<br><br>Mo | Maize silage                        | Total elimination from digester.<br><br>-                              | Methane production is reduced by 10 and 25 %.<br><br>Does not affect methane production.                                                                         | [24]      |
| Cd                  | Waste-activated sludge              | 0.1 mg/g VSS<br><br>10 mg/g VSS<br><br>Further increase                | Augmented hydrolysis and acidification.<br><br>Inhibits hydrolysis, acidification, and methanogenesis.<br><br>Decreases enzyme activity and microbial diversity. | [25]      |
| Ca, Fe, Ni, and Co  | Simulated primary sludge (Dog food) | Not defined                                                            | Eradication of propionate at elevated VFA levels                                                                                                                 | [26]      |
| Ni, Zn, and Cd      | Potato waste                        | 2.5-5.0 ppm range<br><br>At 2.5 ppm                                    | Increase in biogas production rate (Cd>Ni>Zn).                                                                                                                   | [27]      |
| Fe, Co, Mn, Ni,     | Wastewater sludge                   | Not defined.                                                           |                                                                                                                                                                  |           |

|            |  |                                        |                                                                               |      |
|------------|--|----------------------------------------|-------------------------------------------------------------------------------|------|
| Zn, and Mo |  | Deficiency.<br><br>Co-supplementation. | Under performance.<br><br>Acetate to methane conversion rate enhanced (9-50%) | [28] |
|------------|--|----------------------------------------|-------------------------------------------------------------------------------|------|

Note) All references in this table can be found in the main text.

**Table S3.** Transformation of HM during AD reported in the previous literature included in this manuscript.

| Heavy metal                    | Substrate                                     | Fate of Heavy metals                                                                                                                        | Reference |
|--------------------------------|-----------------------------------------------|---------------------------------------------------------------------------------------------------------------------------------------------|-----------|
| Zn, Cu, and Mn                 | Pig slurry                                    | HM has different distribution characteristics (Zn>Cu>Mn).<br><br>Concentration in residue depends on their inclusion in feed.               | [34]      |
| Zn, Cu, As, Cd, Pb, and Cr     | Pig manure                                    | Higher Zn, Cu, and As (931, 419, and 0.49 mg/kg)<br><br>Lower Cd, Pb, and Cr in biogas residue. (0.27, 1.66, 3.88 mg/kg)                    | [35]      |
| Cu, Zn, Cd, As, Pb, Cr, and Mn | Co-digestion (Chicken manure and Corn stover) | Unequal speciation in biogas residue. (152.78, 1101, 0.32, 25.36, 5.32, 27.25, and 1234 mg/kg)                                              | [36]      |
| Zn, Cu, and As                 | Pig and dairy manure                          | HM in biogas residue remain higher than biogas slurry                                                                                       | [37]      |
| Not defined                    | Chicken manure                                | In earliest stage acid generation causes VFA accumulation which dissolves HM.<br>As a result, HM rise in biogas slurry                      | [38]      |
| Zn, Cu, Ni, As, Pb, and Cd     | Swine manure                                  | HM transformed during the AD. The bioavailable fraction of Zn, Cu, Ni, Cd, As, and Pb were 9.71, -6.04, -19.24, 13.62, -16.48, and -7.22 %. | [39]      |
| Zn, Cd, and Ca                 | Sediment sludge                               | pH drops when bought on ground, oxidation, and release of sulfides in soil                                                                  | [40]      |

Note) All references in this table can be found in the main text.

**Table S4.** Typical studies regarding the impact of HM on AD process included in this manuscript.

| Phase                           | Substrate                            | Heavy Metal                             | Impact                                                                                                             | Reference |
|---------------------------------|--------------------------------------|-----------------------------------------|--------------------------------------------------------------------------------------------------------------------|-----------|
| Hydrolysis                      | Poultry and animal manure            | Cu                                      | Interacts with cellulase and heavily alters hydrolysis                                                             | [46]      |
|                                 | Agricultural waste                   | Cu (150 mg/kg)                          | Cellulase activity spiked by 16.33 %. Microbial activity maintained. Stimulates enzymatic reactions.               | [50]      |
|                                 | Agricultural waste                   | Cu (300 mg/kg)                          | Cellulase activity curtailed by 5.86 %. Complete disruption of microbial community.                                | [51]      |
|                                 | Pig manure                           | Cu (5000 mg/kg)<br><br>Higher Cu levels | Worked in favor of hydrolysis. Toxic to microorganisms. Forbids deterioration of composite organic macromolecules. | [51]      |
|                                 | <i>Phragmites</i> straw and cow dung | Ni (0.2, 0.8 and 2.0 mg/L)              | Promoted biogas production.<br><br>Further Ni addition halted biogas production.                                   | [52]      |
| Acidogenesis/Acetogenesis phase | Sewage sludge                        | Cd, Cu, Cr, Zn, Pb, and Ni              | Cd and Cu were most toxic to VFA diminishing microorganisms. Pb and Ni were least toxic.                           | [47]      |
|                                 | Dairy waste                          | Cr and Cd                               | Cd less than 20                                                                                                    | [53]      |

|                      |                                      |              |                                                                                                                                                      |      |
|----------------------|--------------------------------------|--------------|------------------------------------------------------------------------------------------------------------------------------------------------------|------|
|                      |                                      |              | mg/L improved acidogenesis.<br>Cd higher than 20 mg/L halted acidogenesis.<br>Cr (5 mg/L) decreased VFA production.                                  |      |
|                      | Food waste                           | Cu           | Cu (100 mg/L) stimulates VFA destruction.<br>Smaller concentration can augment VFA-degrading organisms.<br>More than 100 mg/L hindered acidogenesis. | [54] |
| Methanogenesis phase | Bamboo wastewater                    | Cu           | 5 mg/L had positive impact on methanogens.<br>300 mg/kg suppressed methanogens                                                                       | [58] |
|                      | <i>Phragmites</i> straw and cow dung | Cu           | Cu (30 & 100 mg/L) hiked biogas production by 43.62, 20.77 %.<br><br>Cu (500 mg/L) biogas production was reduced by 69.47 %.                         | [56] |
|                      | Anaerobic granular sludge            | Ni (30 mg/L) | Ni less than 30 mg/L facilitated methanogenic activity.<br><br>Over 30 mg/L impeded methanogenic activity.<br><br>Supplement rate of 4 mg/L caused   | [59] |

|  |                                                |                               |                                                                                                                       |      |
|--|------------------------------------------------|-------------------------------|-----------------------------------------------------------------------------------------------------------------------|------|
|  |                                                |                               | 25 % higher biogas production.                                                                                        |      |
|  | <i>Phragmites australis</i> straw and Cow dung | Ni (0.8 mg/L)                 | 18 % higher biogas production than without Ni addition.                                                               | [52] |
|  | Organic fraction of MSW                        | Ca, K, Cr, Ni, Zn, Co, and Mo | Dosage of 0.06, 0.6, 3, and 6 mg/L improved cumulative biogas yield by 4.71, 15.29, 14.71, and 14.12 %, respectively. | [60] |
|  | Swine manure                                   | Ni                            | Crucial for coenzyme F430 of methanogenic microorganisms.                                                             | [8]  |
|  | Manure and industrial waste                    | Fe                            | Fe cuts down sulfide intermeddling.<br><br>Improving cellulase activity.                                              | [61] |
|  | Maize straw                                    | Fe                            | 0-4000 mg/L substantially improved biogas production.<br><br>Highest production at 1000 mg/L.                         | [61] |
|  | Dairy manure                                   | Fe                            | Below 12000 mg/L, there was no impact on methane production.<br><br>At 20000 mg/L methane production completely       | [63] |

|  |                           |                       |                                                                                                      |      |
|--|---------------------------|-----------------------|------------------------------------------------------------------------------------------------------|------|
|  |                           |                       | stopped.                                                                                             |      |
|  | -                         | Traces of Fe          | Important for proteolytic enzymes.<br><br>Triggering cytochrome and ferredoxin evolution.            | [64] |
|  | Anaerobic granular sludge | Cd                    | Highest toxicity towards methanogens.<br><br>1 mg/L can affect methanogenic activity.                | [59] |
|  | Potato waste              | Cd (0, 2.5 and 5 ppm) | Biogas generation rate was 2360, 5960, and 5040 ml respectively.                                     | [26] |
|  | Lactoserum                | Cd (0.1-0.3 mg/L)     | Enhances biogas production rate.<br><br>Act as cofactor and energizes enzymatic activity.            | [65] |
|  | Anaerobic granular sludge | Zn                    | 2 mg/L promotes methanogenic activity. If exceeds 3 mg/L, the methanogenic activity declines.        | [59] |
|  | MSW                       | Zn                    | 5 mg/L spiked biogas production by 4.44 %.<br><br>Dropped by 11.11 and 33.33 % when Zn concentration | [60] |

|  |   |    |                                                                                                                  |      |
|--|---|----|------------------------------------------------------------------------------------------------------------------|------|
|  |   |    | was 50 and 100 mg/L.                                                                                             |      |
|  | - | Zn | Zn concentration of 5 mg/L is required for methanogens to retain cell catabolism of methanogenic microorganisms. | [65] |

Note) All references in this table can be found in the main text.
